# Supplementary material
Source: PubMed Central journal article supplement (PMC11423060)
Supplement: media-1.pdf [file media-1.pdf]

Supplementary Data

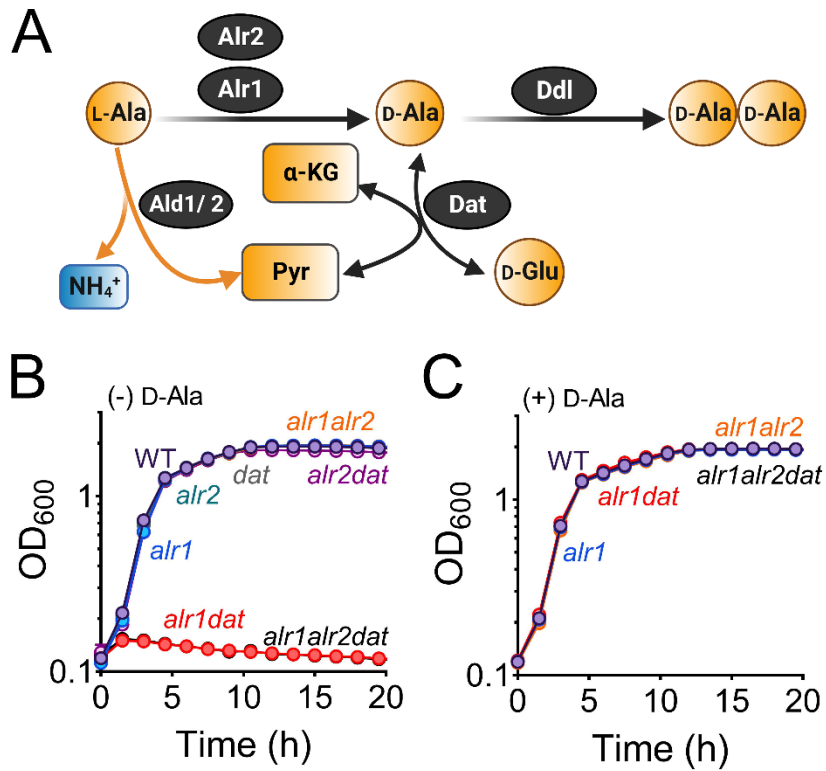

**Figure 1-figure supplement 1. Alr1 and Dat are the primary routes of D-Ala production in *S. aureus*.** (A) Schematic of the predicted D-Ala-D-Ala generating pathways in *S. aureus*. Growth curves of various *S. aureus* strains grown in the (B) absence or (C) presence of 5 mM D-Ala (n=3, mean  $\pm$  SD).

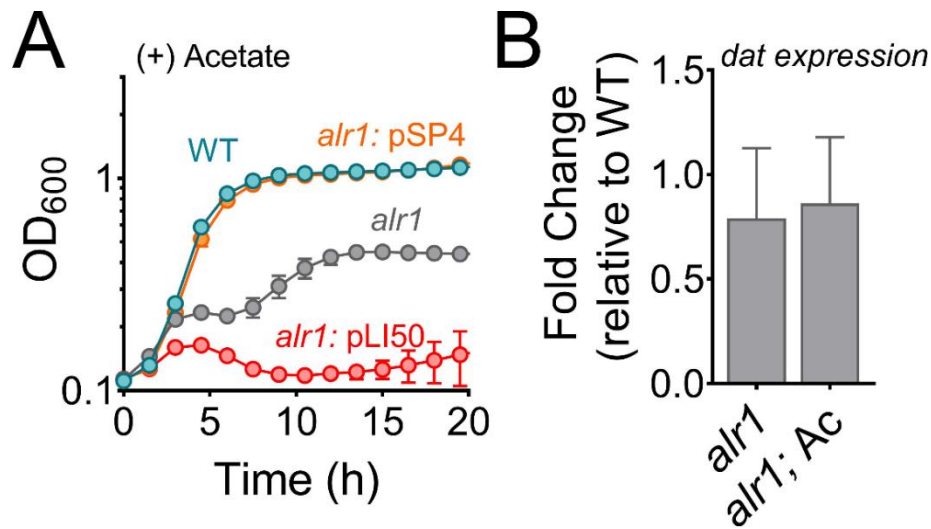

**Figure 2-figure supplement 1. Overexpression of *dat* rescues the growth defect of the *alr1* mutant (A) *dat* was cloned in a multicopy vector (pSP4) controlled by its native promoter. The *S. aureus* strains containing pSP4 and pLI50 (empty vector) were grown in TSB supplemented with 20 mM acetate (B) RT-qPCR analysis of *dat* expression in the *alr1* mutant in the presence or absence of 20 mM acetic acid (n=3, mean  $\pm$  SD).**

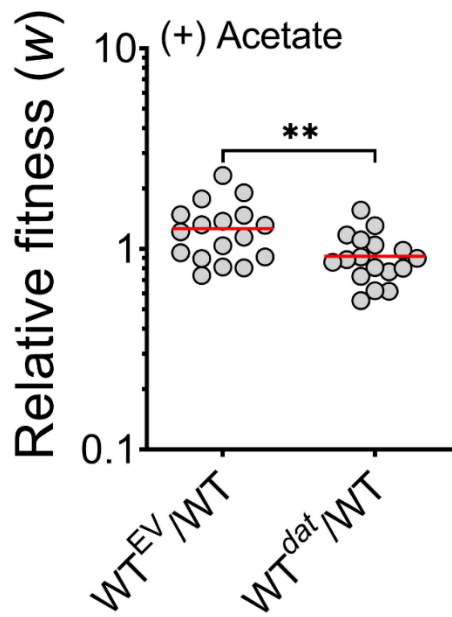

**Figure 3-figure supplement 1. Increased *dat* expression causes a fitness defect.** The mean competitive fitness ( $w$ ) was determined by co-culturing the WT strain with an isogenic mutant that contained either the empty pAQ59 vector integrated into the SaPI chromosomal site (WT<sup>EV</sup>) or the pAS8 vector containing *dat* under the control of its native promoter (WT<sup>dat</sup>) (n=18, the dotted lines indicate the median and quartiles). \*\*, P value <0.01.

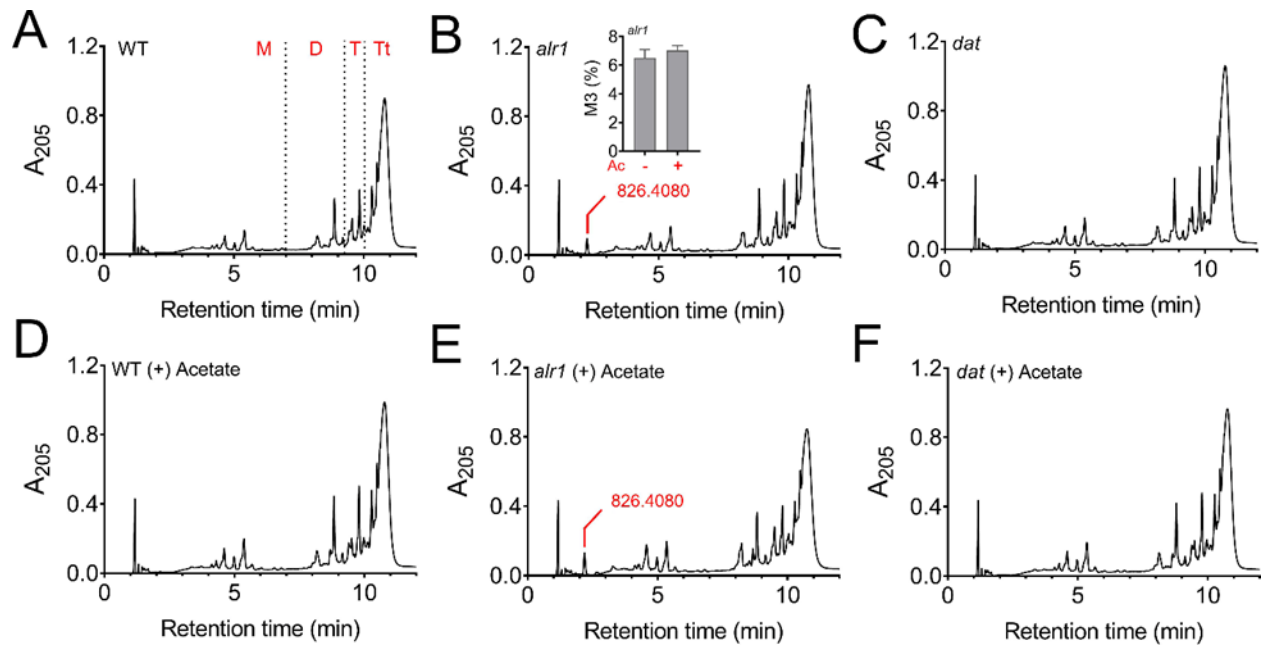

**Figure 4-figure supplement 1. Muropeptide analysis.** Representative chromatograms of muropeptide extracts from (A-C) WT, *alr1* and *dat* mutants, and following (D-F) acetate intoxication. A unique peak corresponding to NAG-NAM-AEK (M3, m/z, Da: 826.4080) was identified in the *alr1* mutant. The peak area of M3 was normalized to the total area of peaks observed in the chromatogram and expressed as percent (see inset figure in B, n=3, mean  $\pm$  SD). M, monomer; D, dimer; T, trimer, Tt, tetramer.

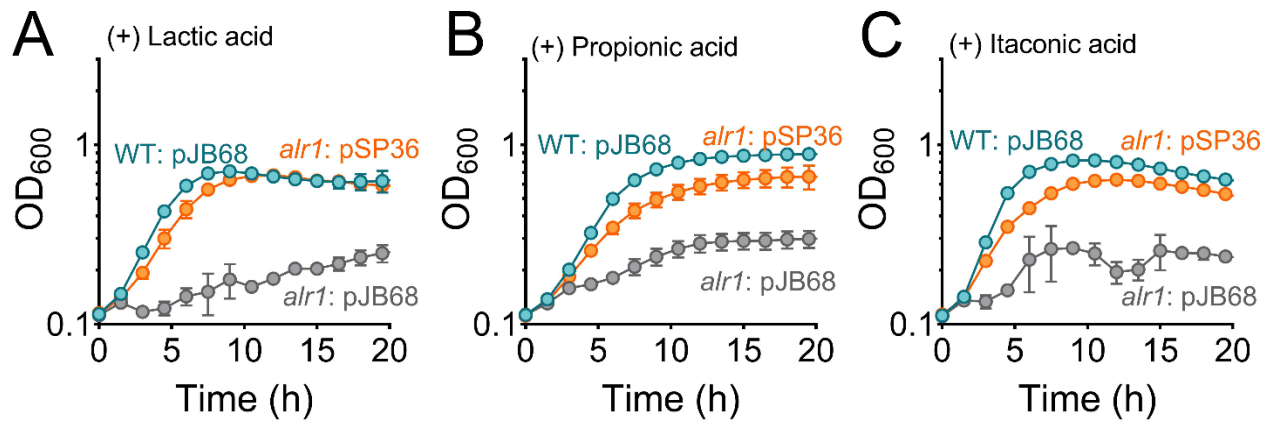

**Figure 6-figure supplement 1. Overexpression of *ddl* rescues the growth defect of the *alr1* mutant** The growth (*OD*<sub>600</sub>) of the WT and *alr1* mutants overexpressing Ddl (pSP36; cadmium inducible expression of *ddl*) in TSB supplemented with (A) lactic acid (40 mM), (B) propionic acid (20 mM) and (C) Itaconic acid (20 mM) in the presence or absence of 5 mM D-Ala (n=3, mean ± SD).

**Table S1: Effect of acetate on Ddl activity**

| <b>Substrate</b> | <b>Condition</b> | <b><math>K_m</math> (mM)</b> | <b><math>V_{max}</math> (<math>\mu\text{M min}^{-1}</math>)</b> | <b><math>k_{cat}</math> (<math>\text{min}^{-1}</math>)</b> |
|------------------|------------------|------------------------------|-----------------------------------------------------------------|------------------------------------------------------------|
| <b>D-Ala</b>     | 0 mM Acetate     | $7.0 \pm 0.6$                | $16.0 \pm 0.4$                                                  | $80.1 \pm 2.1$                                             |
|                  | 100 mM Acetate   | $6.8 \pm 0.6$                | $10.9 \pm 0.3$                                                  | $54.4 \pm 1.6$                                             |
|                  | 300 mM Acetate   | $8.4 \pm 0.6$                | $6.3 \pm 0.1$                                                   | $31.5 \pm 0.7$                                             |
| <b>ATP</b>       | 0 mM Acetate     | $0.6 \pm 0.1$                | $12.3 \pm 1.1$                                                  | $61.7 \pm 5.7$                                             |
|                  | 200 mM Acetate   | $0.8 \pm 0.2$                | $6.9 \pm 0.8$                                                   | $34.4 \pm 3.8$                                             |
|                  | 300 mM Acetate   | $0.8 \pm 0.3$                | $4.0 \pm 0.7$                                                   | $19.9 \pm 3.6$                                             |

**Table S2: Impact of acetate on Ddl stability assessed by DSF**

| Sample                    | T <sub>m</sub> D (°C) | ΔT <sub>m</sub> D (°C)* |
|---------------------------|-----------------------|-------------------------|
| Ddl                       | 45.0 ± 0.0            | -                       |
| Ddl + Sodium acetate (Ac) | 48.7 ± 0.0            | 3.7                     |
| Ddl + ATP                 | 46.4 ± 0.0            | 1.4                     |
| Ddl + ATP + Ac            | 48.9 ± 0.1            | 3.9                     |
| Ddl + ADP                 | 41.9 ± 0.1            | -3.2                    |
| Ddl + ADP + Ac            | 49.7 ± 0.1            | 4.0                     |
| Ddl + D-Ala               | 49.2 ± 0.1            | 4.2                     |
| Ddl + D-Ala + Ac          | 49.6 ± 0.0            | 4.5                     |
| Ddl + D-Ala + ATP + Ac    | 47.1 ± 0.1            | 2.0                     |
| Ddl + D-Ala + ADP + Ac    | 49.8 ± 0.0            | 4.8                     |

\*The ΔT<sub>m</sub> D values are calculated as the difference in melting temperature of the Ddl apo protein to Ddl with added substrates or acetate inhibitor.

**Table S3: Refinement statistics of Ddl/Acetate structure**

---

|                                |                               |
|--------------------------------|-------------------------------|
| Resolution Range               | 48.21 – 1.92 (1.989 – 1.92)   |
| Space group                    | P 2 21 21                     |
| Unit cell                      | 55.123 65.817 99.423 90 90 90 |
| Total reflections              | 173526 (12202)                |
| Unique reflections             | 20366 (2806)                  |
| Multiplicity                   | 8.5 (9.3)                     |
| Completeness (%)               | 94.80 (50.46)                 |
| Mean I/sigma(I)                | 10.99 (1.72)                  |
| Wilson B-factor                | 37.29                         |
| R-merge                        | 0.097 (0.33)                  |
| R-meas                         | 0.104 (0.35)                  |
| R-pim                          | 0.036 (0.12)                  |
| CC1/2                          | 0.998 (0.95)                  |
| CC*                            | 0.999 (0.99)                  |
| Reflections used in refinement | 26870 (1416)                  |
| Reflections used for R-free    | 1601 (92)                     |
| R-work                         | 0.21 (0.42)                   |
| R-free                         | 0.27 (0.47)                   |
| CC (work)                      | 0.223 (0.07)                  |
| CC (free)                      | 0.217 (-0.16)                 |
| Number of non-hydrogen atoms   | 2963                          |
| macromolecules                 | 2777                          |
| ligands                        | 10                            |
| solvent                        | 176                           |
| Protein residues               | 355                           |
| RMS(bonds)                     | 0.009                         |
| RMS(angles)                    | 1.10                          |
| Ramachandran favored (%)       | 93.70                         |
| Ramachandran allowed (%)       | 6.02                          |
| Ramachandran outliers (%)      | 0.29                          |
| Rotamer outliers (%)           | 0.00                          |



|                  |       |
|------------------|-------|
| Clashscore       | 6.88  |
| Average B-factor | 43.60 |
| macromolecules   | 43.60 |
| ligands          | 45.09 |
| solvent          | 43.64 |

---

**Table S4: Glide scores from molecular docking studies of organic anions**

| <b>Organic Anion</b> | <b>ATP binding site</b> | <b>D-Ala binding site</b> |
|----------------------|-------------------------|---------------------------|
| L-lactate            | -4.851                  | -4.431                    |
| Propionate           | -2.317                  | -1.883                    |
| Itaconate            | -3.572                  | -3.575                    |

**Table S5: Strains used in this study**

| Strains                                 | Description                                                                                                                                       | Source        |
|-----------------------------------------|---------------------------------------------------------------------------------------------------------------------------------------------------|---------------|
| <i>E. coli</i> Electro-Ten-Blue         | General plasmid maintenance strain                                                                                                                | Stratagene    |
| <i>S. aureus</i> RN4220                 | Restriction-deficient strain is routinely used as a transformation intermediate                                                                   | (59)          |
| <i>S. aureus</i> RN4220: pRN7023        | Restriction deficient strain carrying pRN7023 plasmid containing integrase gene routinely used as a transformation intermediate                   | (43)          |
| <i>E. coli</i> DH5α                     | General plasmid maintenance strain                                                                                                                | Thermo Fisher |
| <i>E. coli</i> BL21(DE3)                | Protein over-expression and purification strain                                                                                                   | Novagen       |
| <i>S. aureus</i> JE2                    | <i>S. aureus</i> USA300 LAC cured of all 3 native plasmids                                                                                        | (41)          |
| JE2 <i>alr1</i>                         | <i>bursa aurealis</i> transposon mutant, Erm <sup>R</sup>                                                                                         | NTML          |
| JE2 <i>alr1::alr1</i>                   | WT copy of <i>alr1</i> complemented at the SaPI1 site of <i>bursa aurealis</i> transposon mutant, Erm <sup>R</sup>                                | This study    |
| JE2 <i>citZ</i>                         | <i>bursa aurealis</i> transposon mutant, Erm <sup>R</sup>                                                                                         | NTML          |
| JE2 <i>citZalr1</i>                     | <i>bursa aurealis</i> transposon mutant, Erm <sup>R</sup> , Kan <sup>R</sup>                                                                      | This study    |
| JE2 <i>dat</i>                          | <i>bursa aurealis</i> transposon mutant, Erm <sup>R</sup>                                                                                         | NTML          |
| JE2 $\Delta$ <i>alr2</i>                | Inframe isogenic deletion mutant of JE2                                                                                                           | This study    |
| JE2 <i>alr1</i> $\Delta$ <i>alr2</i>    | <i>bursa aurealis</i> transposon mutant, Erm <sup>R</sup> , transduced into inframe isogenic deletion mutant JE2 $\Delta$ <i>alr2</i>             | This study    |
| JE2 $\Delta$ <i>alr2dat</i>             | <i>bursa aurealis</i> transposon mutant, Erm <sup>R</sup> , transduced into inframe isogenic deletion mutant JE2 $\Delta$ <i>alr2</i>             | This study    |
| JE2 <i>alr1</i> $\Delta$ <i>alr2dat</i> | <i>bursa aurealis</i> transposon mutant, Tet <sup>R</sup> , transduced into inframe isogenic deletion mutant JE2 <i>alr1</i> $\Delta$ <i>alr2</i> | This study    |
| JE2 <i>alr1dat</i>                      | <i>bursa aurealis</i> transposon mutant, Erm <sup>R</sup> , Tet <sup>R</sup>                                                                      | This study    |
| JE2 <i>alr1: dat</i>                    | pLI50 <i>dat</i> plasmid (pSP4) transduced into <i>bursa aurealis</i> transposon mutant, Erm <sup>R</sup>                                         |               |
| JE2 <i>pepV</i> <sup>ASD1-467</sup>     | Isogenic deletion mutant of SD1 and <i>pepV</i>                                                                                                   | This study    |
| JE2 <i>alr1pepV</i> <sup>ASD1-467</sup> | <i>bursa aurealis</i> transposon mutant, Erm <sup>R</sup> transduced into isogenic deletion mutant of SD1 and <i>pepV</i>                         | This study    |
| JE2 $\Delta$ <i>pepV</i>                | Inframe isogenic deletion mutant of JE2                                                                                                           | This study    |
| JE2 <i>alr1</i> $\Delta$ <i>pepV</i>    | <i>bursa aurealis</i> transposon mutant, Erm <sup>R</sup> transduced into inframe isogenic deletion mutant JE2 $\Delta$ <i>pepV</i>               | This study    |

|                                        |                                                                                                                                                                       |            |
|----------------------------------------|-----------------------------------------------------------------------------------------------------------------------------------------------------------------------|------------|
| JE2 <i>pepV</i> <sup>Q12STOP</sup>     | Glutamine to STOP codon substitution at 12 <sup>th</sup> amino acid position in <i>PepV</i>                                                                           | This study |
| JE2 <i>alr1pepV</i> <sup>Q12STOP</sup> | <i>Bursa aurealis</i> transposon mutant, Erm <sup>R</sup> transduced into glutamine to STOP codon substitution at 12 <sup>th</sup> amino acid position in <i>PepV</i> | This study |
| JE2 WT: pJB68                          | pJB68 transduced into WT JE2                                                                                                                                          | This study |
| JE2 WT: pSP36                          | pSP36 transduced into WT JE2                                                                                                                                          | This study |
| JE2 <i>alr1</i> : pJB68                | pJB68 transduced into JE2 <i>alr1</i>                                                                                                                                 | This study |
| JE2 <i>alr1</i> : pSP36                | pSP36 transduced into WT <i>alr1</i>                                                                                                                                  | This study |
| JE2 WT::pAQ59                          | pAQ59 empty vector inserted at the SaPI1 site of WT JE2                                                                                                               | This study |
| JE2 WT::pAS8                           | <i>dat</i> (under its native promoter) inserted at the SaPI1 site of WT JE2                                                                                           | This study |

---

**Table S6: Plasmids used in this study**

| <b>Plasmids</b> | <b>Description</b>                                                                                 | <b>Source</b> |
|-----------------|----------------------------------------------------------------------------------------------------|---------------|
| pLI50           | <i>E. coli</i> - <i>S. aureus</i> shuttle vector                                                   | (60)          |
| pJB38           | <i>E. coli</i> - <i>S. aureus</i> allelic exchange vector                                          | (42)          |
| pJC1111         | <i>E. coli</i> - <i>S. aureus</i> SaPI1 site integration vector                                    | (43)          |
| pJB68           | <i>E. coli</i> - <i>S. aureus</i> cadmium inducible shuttle vector                                 | (42)          |
| pET28a          | Expression vector for purification of protein in <i>E. coli</i> BL21 (DE3)                         | Novagen       |
| pAS3            | pJC1111 based vector for integration of WT copy of <i>alr1</i> at the SaPI1 site                   | This study    |
| pAS2            | pJB38 based vector for <i>alr2</i> chromosomal deletion                                            | This study    |
| pSP4            | pLI50 <i>dat</i> (under control of its native promoter)                                            | This study    |
| pSP19           | pJB38 based vector for <i>pepV</i> SD1 chromosomal deletion                                        | This study    |
| pSP20           | pJB38 based vector for <i>pepV</i> SD1-467 chromosomal deletion                                    | This study    |
| pSP16           | pJB38 based vector for <i>pepV</i> chromosomal deletion                                            | This study    |
| pSP15           | pJB38 based vector for substitution of chromosomal <i>pepV</i> with <i>pepV</i> <sup>Q12STOP</sup> | This study    |
| pSP36           | pJB68 based vector for overexpression of <i>ddl</i>                                                | This study    |
| pSP32           | pET28a based vector for purification of full length Ddl (C-terminal his tag)                       | This study    |
| pAQ59           | <i>E. coli</i> - <i>S. aureus</i> SaPI1 site integration vector with pSC101 ori region             | (61)          |
| pAS8            | pAQ59 based vector for integration of <i>dat</i> gene under its native promoter at the SaPI1 site  | This study    |

**Table S7: Primers used in this study**

| <b>Gene/Modification</b>                | <b>Primer name</b> | <b>Primer sequence (5' – 3')</b>                       |
|-----------------------------------------|--------------------|--------------------------------------------------------|
| <i>alr1</i>                             | alr1_F             | TGCTGACGAACCAGGAGATA                                   |
|                                         | alr1_R             | TGTAGTTGGGTCAGTAGCTG                                   |
| <i>alr1</i> complementation             | alr1_comp_F        | CGGCCGCTGCATGCCTGCAGACATGAGCAACGTAAA ATTG              |
|                                         | alr1_comp_R        | AGCTCGGTACCCGGGGATCCAATGACCTTTAATTACT<br>CTAATGATAAC   |
| <i>citZ</i>                             | 1641_F             | CAGCGGAGACTAAAATAAGTTC                                 |
|                                         | 1641_R             | CCCAATCTCAGATAACATCGTC                                 |
| <i>dat</i>                              | dat_F              | ACTATAGGTGGCGGTACTTA                                   |
|                                         | dat_R              | ACCATCGGATATCTTCAACG                                   |
| <i>alr2</i> deletion                    | alr2_UP_F          | CGAGGCCCTTTCGTCTTCAACTTAGAAGGTAATGG CTC                |
|                                         | alr2_UP2_R         | TCATAGCACTTGCTGTCAATGTATTACAC                          |
|                                         | alr2_DN2_F         | ATTGACAGCAAGTGCTATGAATCATGATTC                         |
|                                         | alr2_DN_R          | TTGCATGCCTGCAGGTCGACGCTTCTTCATTTCTATTA<br>ACAAG        |
| <i>dat</i> complementation              | dat promoter_F     | CCTTTCGTCTTCAAGAATTCGATGTGAGTAGGACAGA AATG             |
|                                         | dat promoter_R     | TTTTTCCATTCGAAATCGACTTCCTTTTTTC                        |
|                                         | dat_pLI50_F        | TCGATTTCGAATGGAAAAAATTTTTTAAATGGTG                     |
|                                         | dat_pLI50_R        | TTGCATGCCTGCAGGTCGACCGAAAGTTGATAAATTT<br>AAGTAATTTAATC |
| TSS identification of <i>dat</i> operon | pepV_TSS_R1        | P-CCATCTCTATGTGCAATTC                                  |

|                                      |                    |                                                   |
|--------------------------------------|--------------------|---------------------------------------------------|
|                                      | pepV_TSS_R2        | GCGTCTTCTGATGCTTTTGC                              |
|                                      | pepV_TSS_F3        | GTCCTCGTAAGGCATTAGAC                              |
|                                      | M13F (-20)         | GTAAAACGACGGCCAG                                  |
|                                      | M13R               | CAGGAAACAGCTATGAC                                 |
| <i>pepV</i> ΔSD1-467                 | RBS1pepV_UP_F      | CCTTTCGTCTTCAAGAATTCAGCGACGCAATTAGGAA<br>C        |
|                                      | RBS1pepV_UP_R      | TTATTCCTCCTTTTTCTATAAGTTAAATTCTATTTTACAT GAAAAG   |
|                                      | RBS1pepV_DN_F      | TATAGAAAAAGGAGGAATAATATATGGAAAAAATTTTT<br>TTAAATG |
|                                      | RBS1pepV_DN_R      | TATAGAAAAAGGAGGAATAATATATGGAAAAAATTTTT<br>TTAAATG |
| <i>pepV</i> deletion                 | pepV_UP2_F         | CCTTTCGTCTTCAAGAATTCACCAATTAAGAAGTAAA<br>AACAAATC |
|                                      | pepV_UP2_R         | TTTTTCCATTTCGAAATCGACTTCCTTTTTTC                  |
|                                      | pepV_DN2_F         | TCGATTTGAATGGAAAAAATTTTTTAAATGGTG                 |
|                                      | pepV_DN2_R         | TTGCATGCCTGCAGGTGCGACTTTCAACTGAAAATGAG<br>AAAC    |
| <i>pepV</i> Q12STOP                  | pepV_STOP_UP<br>_F | CCTTTCGTCTTCAAGAATTCCAAATCCGAAAGAATATG<br>C       |
|                                      | pepV_STOP_UP_R     | TAATGATTTAATCTTCGTATTGTTGAACCTTTTTC               |
|                                      | pepV_STOP_D N_F    | ATACGAAGATTAAATCATTAAATGACTTAAAAGGATTATT AG       |
|                                      | pepV_STOP_D N_R    | TTGCATGCCTGCAGGTGCGACAAAGACCTGCGTTTTCA<br>TTATC   |
| <i>ddl</i> overexpression<br>plasmid | ddl_pJB68_F        | TTTATAAGGAGGAAAAACATATGACAAAAGAAAATATT<br>TGTATCG |
|                                      | ddl_pJB68_R        | GAATAGGCGCGCCTGAATTCATCCATGATTGAATTTG<br>CTTTAATG |

|                                               |                |                                                        |
|-----------------------------------------------|----------------|--------------------------------------------------------|
| Ddl purification plasmid                      | ddl_C_Histag_F | CTTTAAGAAGGAGATATACCATGACAAAAGAAAATATT<br>TGTATCG      |
|                                               | ddl_C_Histag_R | CAGTGGTGGTGGTGGTGGTGGTCAATTTTGTATTTAT<br>TTTTCTGTTTATC |
| <i>ddl</i> RT-qPCR                            | ddl_RT_F       | GGGCTTTTTGAAGTTTTGGA                                   |
|                                               | ddl_RT_R       | TGGTAACCCTCGATGTTCAA                                   |
| <i>murF</i> RT-qPCR                           | murF_RT_F      | TCACAATTGATTCACGAGCA                                   |
|                                               | murF_RT_R      | CCCAGCACCATCTTGTAAATG                                  |
| <i>dat</i> RT-qPCR                            | dat_RT_F       | GATGGTTACGTTGCGACATT                                   |
|                                               | dat_RT_R       | CACCTCGATGTTGAATTGCT                                   |
| <i>sigA</i> RT-qPCR                           | JE2_RT_sigA_F  | AACTGAATCCAAGTGATCTTAGTG                               |
|                                               | JE2_RT_sigA_R  | TCATCACCTTGTTCAATACGTTTG                               |
| <i>dat</i> insertion at the SaPI1 site (pAS8) | dat_UP2_F      | GAGCCGCTGCATGCCTGCAGGATGTGAGTAGGACAG<br>AAATG          |
|                                               | dat_UP_R       | TTTTTCCATTGAAATCGACTTCCTTTTTTC                         |
|                                               | dat_DN_F       | TCGATTTGGAATGGAAAAATTTTTTAAATGGTG                      |
|                                               | dat_DN_R       | AGCTCGGTACCCGGGGATCCCGAAAGTTGATAAATTT<br>AAGTAATTTAATC |



**Table S8: Table of Multiple Reaction Monitoring (MRM) transitions**

| <b>Metabolite</b> | <b>Polarity</b> | <b>MRM (Q1/Q3)</b> | <b>CE (V)</b> | <b>DP (V)</b> | <b>RT</b> | <b>Column</b> |
|-------------------|-----------------|--------------------|---------------|---------------|-----------|---------------|
| L-Ala             | (+)             | 90.1 / 44.0        | 17            | 65            | 6.4       | C             |
| D-Ala             | (+)             | 90.1 / 44.0        | 17            | 65            | 9.5       | C             |
| D-Ala-D-Ala       | (+)             | 161.0 / 44.2       | 30.5          | 65            | 3.4       | XB            |
| UDP-NAG           | (-)             | 606.0 / 79.0       | -149          | -80           | 12.7      | XB            |
| UDP-NAM           | (-)             | 678.1 / 79.0       | -120          | -80           | 13.2      | XB            |
| UDP-NAM-A         | (-)             | 749.1 / 403.0      | -42           | -90           | 13.4      | XB            |
| UDP-NAM-AE        | (-)             | 878.2 / 403.0      | -48           | -105          | 14.3      | XB            |
| UDP-NAM-AEK       | (-)             | 1006.2 / 403.0     | -50           | -130          | 14.9      | XB            |
| UDP-NAM-AEKAA     | (-)             | 1148.5 / 403.0     | -55           | -140          | 14.6      | XB            |
| NAM               | (-)             | 292.0 / 89.0       | -16           | -30           | 6.2       | XB            |
| NAG               | (+)             | 204.0 / 138.1      | 18.9          | 30            | 5.6       | XB            |
| Br-ATP (IS)       | (-)             | 588.0 / 159.0      | -38.9         | -60           | 6.0       | XB            |
| Ribitol (IS)      | (-)             | 151.1 / 89.0       | -14.8         | -60           | 5.3       | XB            |

CE: Collision energy ;DP: Declustering potential; RT: Retention Time; C: CHIROBIOTIC® T column; XB: XBridge Amide column

**Table S9: HRMS base peak identification of isotopologues**

|                                    | <b>Metabolite</b>     | <b>Isotopologues(<sup>13</sup>C<sup>15</sup>N)</b> | <b>Base peak (m/z)</b> |
|------------------------------------|-----------------------|----------------------------------------------------|------------------------|
| <b>D-Ala-D-Ala (Positive mode)</b> |                       |                                                    |                        |
| 1                                  | C6H12N2O3             | C <sub>0</sub> N <sub>0</sub>                      | 161.0921               |
| 2                                  | [13]C1C5H12N2O3       | C <sub>1</sub> N <sub>0</sub>                      | 162.0954               |
| 3                                  | [13]C2C4H12N2O3       | C <sub>2</sub> N <sub>0</sub>                      | 163.0988               |
| 4                                  | [13]C3C3H12N2O3       | C <sub>3</sub> N <sub>0</sub>                      | 164.1021               |
| 5                                  | [13]C3C3H12[15]N1N1O3 | C <sub>3</sub> N <sub>1</sub>                      | 165.09917              |
| 6                                  | [13]C3C3H12[15]N2O3   | C <sub>3</sub> N <sub>2</sub>                      | 166.0962               |
| 7                                  | [13]C4C2H12N2O3       | C <sub>4</sub> N <sub>0</sub>                      | 165.10549              |
| 8                                  | [13]C5C1H12N2O3       | C <sub>5</sub> N <sub>0</sub>                      | 166.10884              |
| 9                                  | [13]C6H12N2O3         | C <sub>6</sub> N <sub>0</sub>                      | 167.1122               |
| 10                                 | [13]C6H12[15]N1N1O3   | C <sub>6</sub> N <sub>1</sub>                      | 168.1092               |
| 11                                 | [13]C6H12[15]N2O3     | C <sub>6</sub> N <sub>2</sub>                      | 169.1063               |
| 12                                 | [13]C1C5H12[15]N1N1O3 | C <sub>1</sub> N <sub>1</sub>                      | 163.09246              |
| 13                                 | [13]C1C5H12[15]N2O3   | C <sub>1</sub> N <sub>2</sub>                      | 164.0895               |
| 14                                 | [13]C2C4H12[15]N1N1O3 | C <sub>2</sub> N <sub>1</sub>                      | 164.0958               |
| 15                                 | [13]C2C4H12[15]N2O3   | C <sub>2</sub> N <sub>2</sub>                      | 165.09285              |
| 16                                 | [13]C4C2H12[15]N1N1O3 | C <sub>4</sub> N <sub>1</sub>                      | 166.1025               |
| 17                                 | [13]C4C2H12[15]N2O3   | C <sub>4</sub> N <sub>2</sub>                      | 167.09956              |
| 18                                 | [13]C5C1H12[15]N1N1O3 | C <sub>5</sub> N <sub>1</sub>                      | 167.10588              |
| 19                                 | [13]C5C1H12[15]N2O3   | C <sub>5</sub> N <sub>2</sub>                      | 168.1029               |
| 20                                 | C6H12[15]N1N1O3       | C <sub>0</sub> N <sub>1</sub>                      | 162.0891               |
| 21                                 | C6H12[15]N2O3         | C <sub>0</sub> N <sub>2</sub>                      | 163.0861               |
| <b>D-Glu (Negative mode)</b>       |                       |                                                    |                        |
| 1                                  | C5H9NO4               | C <sub>0</sub> N <sub>0</sub>                      | 146.04588              |
| 2                                  | C5H9[15]NO4           | C <sub>0</sub> N <sub>1</sub>                      | 147.04292              |
| 3                                  | [13]C1C4H9NO4         | C <sub>1</sub> N <sub>0</sub>                      | 147.04924              |
| 4                                  | [13]C2C3H9NO4         | C <sub>2</sub> N <sub>0</sub>                      | 148.05259              |
| 5                                  | [13]C2C3H9[15]NO4     | C <sub>2</sub> N <sub>1</sub>                      | 149.04963              |
| 6                                  | [13]C1C4H9[15]NO4     | C <sub>1</sub> N <sub>1</sub>                      | 148.04627              |
| 7                                  | [13]C3C2H9[15]NO4     | C <sub>3</sub> N <sub>1</sub>                      | 150.05298              |
| 8                                  | [13]C4C1H9[15]NO4     | C <sub>4</sub> N <sub>1</sub>                      | 151.05634              |
| 9                                  | [13]C5H9[15]NO4       | C <sub>5</sub> N <sub>1</sub>                      | 152.05969              |
| 10                                 | [13]C3C2H9NO4         | C <sub>3</sub> N <sub>0</sub>                      | 149.05595              |
| 11                                 | [13]C4C1H9NO4         | C <sub>4</sub> N <sub>0</sub>                      | 150.0593               |
| 12                                 | [13]C5H9NO4           | C <sub>5</sub> N <sub>0</sub>                      | 151.06266              |

RT: D-Ala-D-Ala, 3.4 mins on 10 cm XBridge amide column; D-Glu, 6.4 mins on CHIROBIOTIC® T column
